# Supplementary material
Source: Springer Nature journal article supplement (https://www.springermedizin.de/resource/supplementary/12889_2010_2634_MOESM2_ESM.pdf/9486812)

Abdominal SCF (l)

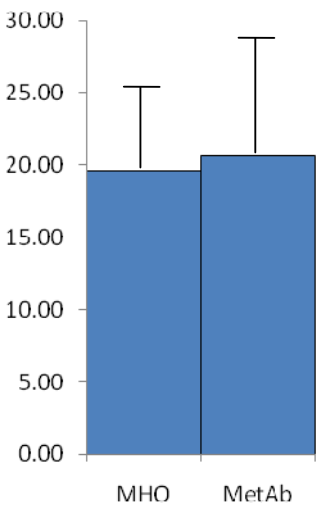

Thigh:IAF

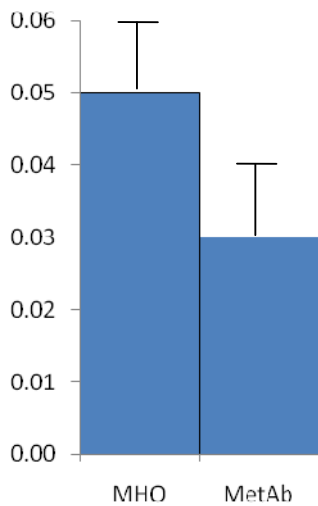

Waist:Hip ratio

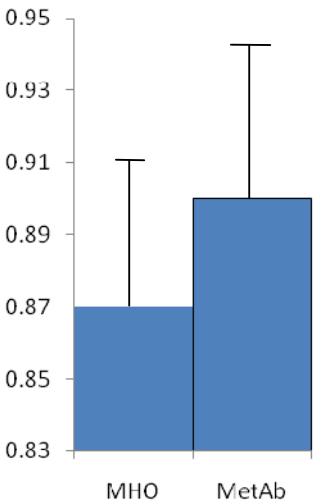

HOMA-IR

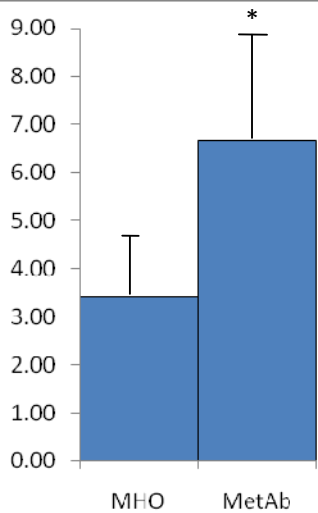

Supplement: MOESM2 [file 9486812]
